# Supplementary material for: The Statistical Approach in Trial-based Economic Evaluations Matters: Get your Statistics Together!
Source: Research Square preprint supplement (doi:10.21203/rs.3.rs-134947/v1), 2021-01-15
Supplement: Supplementary file 1 [file 6d35a8a74067bac576644607.docx]

**The statistical approach in trial-based economic evaluations matters: get your statistics together!**

By:

*Elizabeth N. Mutubuki,1 *Mohamed El Alili,2 Judith E. Bosmans,2  Teddy Oosterhuis,2 Frank Snoek,3 Raymond W. J. G. Ostelo,1,4 Maurits W. van Tulder,2,5 Johanna M. van Dongen,1,2

*Contributed equally

Journal: Expert Review of Pharmacoeconomics and Outcomes Research

1Department of Health Sciences, Faculty of Science, VU Amsterdam, Amsterdam Movement Sciences Research Institute, the Netherlands

2Department of Health Sciences, Faculty of Science, VU Amsterdam, Amsterdam Public Health Research Institute, the Netherlands

3Department of Medical Psychology, Amsterdam UMC, VU Amsterdam, Amsterdam, the Netherlands

4Department of Epidemiology and Biostatistics, Amsterdam UMC, Location VUmc, Amsterdam Movement Sciences Research Institute, the Netherlands

5Department of Physiotherapy & Occupational Therapy, Aarhus University Hospital, Aarhus, Denmark

Corresponding author:

Mohamed El Alili, Department of Health Sciences, Faculty of Science, VU Amsterdam, De Boelelaan 1085, 1081 HV, Amsterdam, the Netherlands. Tel.: +31 20 59 82790; Fax: +31 20 6462457; E-mail: [m.elalili@vu.nl](mailto:m.elalili@vu.nl)

Of note: Please refer to this study when using the below syntax.

********** CEA ANALYSES **********

clear

set more off

cd "XXX"

capture log close

log using "XXXX.smcl", replace

***** Fill in n = number of imputations *****

local n = XXX

forvalues j=1(1)`n' {

local y = `j'

use "XXXXX`y'", clear

bootstrap bootcost_diff = _b[YYYY:XXXX] booteffect_diff = _b[YYYY:XXXX], reps(XXXX) seed(XXXX) saving("boots`y'", replace) bca: sureg (YYYY = XXXX) (YYYY = XXXX)

mat betaCE= e(b) /* extract the matrix of regression coefficients */

mat se = e(se) /* extract standard errors */

mat limits = e(ci_bc) /* extract confidence limits */

mat vari = e(V) /* extract the variance-covariance matrix */

gen cost_diff = betaCE[1,1] /* create differential costs */

gen effect_diff = betaCE[1,2] /* create differential effects */

gen N = e(N) /* extract sample size*/

gen LL_effect = limits[1,2]

gen UL_effect = limits[2,2]

gen LL_cost = limits[1,1]

gen UL_cost = limits[2,1]

gen cost_var = vari[1,1] /* extract the variance of the mean differential costs from the VC matrix */

gen effect_var = vari[2,2] /* extract the variance of the mean differential effect from the VC matrix */

gen cov = vari[1,2] /* extract the covariance between mean differential costs and effect */

save postboots`y', replace

}

clear

set more off

cd "XXXX"

***** Fill in n = number of imputations *****

local n = XX

/* append bootstrap samples in 1 file */

use boots1, clear

forvalues k=2(1)`n' {

local z = `k'

append using boots`z'

}

save boots, replace

*** All information from the extra information from bivariate regression needs to be appended, allowing to pool according to Rubin’s rules ***

use postboots1, clear

forvalues l=2(1)`n' {

local a = `l'

append using postboots`a'

}

by _mi_m, sort: drop if _n != _N

save postboots, replace

keep cost_diff LL_cost UL_cost cost_var effect_diff LL_effect UL_effect effect_var cov

append using boots

gen Za=1.95996

/* estimate confidence limits for effects using Rubin's rules */

egen effect_diff_pooled = mean(effect_diff)

egen W=mean(effect_var)

gen _Bdiff=(effect_diff-effect_diff_pooled)^2

egen _Bsum=total(_Bdiff)

gen B=(1/(`n'-1))*_Bsum

gen T=W+(1+(1/`n'))*B

gen seT=sqrt(T)

gen LL_effect_pooled=effect_diff_pooled -(Za*seT)

gen UL_effect_pooled=effect_diff_pooled +(Za*seT)

/* estimate bias-corrected and accelerated confidence limits for costs */

egen cost_diff_pooled = mean(cost_diff)

egen LL_cost_pooled = mean(LL_cost)

egen UL_cost_pooled = mean(UL_cost)

generate ICER = cost_diff_pooled /effect_diff_pooled

display ICER

display effect_diff_pooled

display LL_effect_pooled

display UL_effect_pooled

display cost_diff_pooled

display LL_cost_pooled

display UL_cost_pooled

label variable bootcost_diff "Bootstrapped estimates"

label variable cost_diff_pooled "Point estimate"

twoway (scatter bootcost_diff booteffect_diff, msize(small)) (scatter cost_diff_pooled effect_diff_pooled, msize(small)), ///

ytitle(Cost differences (€)) yline(0) xline (0) ///

name(CEplane, replace)

graph save "CEplane.gph", replace

gen quadrantcompl1 = 0

replace quadrantcompl1 = 1 if bootcost_diff > 0 & booteffect_diff > 0

replace quadrantcompl1 = 2 if bootcost_diff < 0 & booteffect_diff > 0

replace quadrantcompl1 = 3 if bootcost_diff < 0 & booteffect_diff < 0

replace quadrantcompl1 = 4 if bootcost_diff > 0 & booteffect_diff < 0

label variable quadrantcompl1 "quadrant of CE plane"

label define quadrantcompl1 1 NEQuadrant 2 SEQuadrant 3 SWQuadrant 4 NWQuadrant

sort quadrantcompl1

proportion quadrantcompl1

/* estimate CEA curve using Rubin's rules */

forvalues i= 0 (1000) 80000 { /* local macro i counts from XXXXXX to XXXXXX in steps of XXXXXX */

local x = `i'/ 1000 /* x is created just for variable names */

gen NB`x'=(`i'*effect_diff)-cost_diff /* NBs are generated for each value of i */

gen varNB`x'=`i'^2 * effect_var + cost_var - 2*`i'*cov /* variance of NB is generated */

gen seNB`x'=sqrt(varNB`x') /* standard error of NB is generated */

egen meanNB`x'=mean(NB`x')

egen W_NB`x'=mean(varNB`x')

gen _Bdiff_NB`x'=(NB`x'-meanNB`x')^2

egen _Bsum_NB`x'=total(_Bdiff_NB`x')

gen B_NB`x'=(1/(`n'-1))*_Bsum_NB`x'

gen T_NB`x'=W_NB`x'+(1+(1/`n'))*B_NB`x'

gen seT_NB`x'=sqrt(T_NB`x')

local z = meanNB`x'/seT_NB`x'

local prob = normal(`z')

matrix row = (`i',`prob')

matrix ceac = (nullmat(ceac)\row) /* Matrix containing probability that intervention is cost-effective for each value of i */

}

svmat ceac /* The matrix is converted into variables */

matrix drop ceac /* The unneeded matrix is now dropped */

twoway (line ceac2 ceac1), ytitle(Probability intervention cost-effective) yscale(range(0 1)) ylabel(0 (0.2) 1) xtitle(Ceiling ratio: €/ QALY) xscale(range(0 80000)) xlabel(0 (10000) 50000)

graph save "CEAC.gph", replace

save postboots, replace

capture log close
